# Supplementary material
Source: publisher site journal article supplement (http://www.kjim.org/upload/media/kjim-2019-446-suppl3.pdf)
Supplement: Supplementary file 1 [file kjim-2019-446-suppl3.pdf]

**Supplementary Table 3. Comparison of baseline characteristics between enrolled and excluded patient group**

| Characteristic                        | Enrolled group (n = 169) | Excluded group (n = 335) | p value |
|---------------------------------------|--------------------------|--------------------------|---------|
| 28-Day mortality                      | 114 (67.5)               | 220 (65.7)               | 0.689   |
| Age, yr                               | 63.3 ± 15.7              | 62.1 ± 16.5              | 0.426   |
| Male sex                              | 73 (43.2)                | 127 (37.9)               | 0.252   |
| Arterial pH                           | 7.31 ± 0.14              | 7.30 ± 0.22              | 0.879   |
| Serum sodium, mEq/L                   | 140.3 ± 8.7              | 139.9 ± 8.3              | 0.687   |
| Serum potassium, mEq/L                | 4.3 ± 0.9                | 4.4 ± 0.9                | 0.543   |
| Urea nitrogen, mg/dL                  | 61.5 ± 31.2              | 63.3 ± 35.6              | 0.572   |
| Serum creatinine, mg/dL               | 2.87 ± 1.54              | 2.99 ± 2.24              | 0.544   |
| Hematocrit, %                         | 27.7 ± 5.8               | 27.8 ± 5.5               | 0.763   |
| WBC count, × 10 <sup>3</sup> /μL      | 19.5 ± 83.1              | 12.1 ± 10.4              | 0.251   |
| Platelet count, × 10 <sup>3</sup> /μL | 89.9 ± 80.2              | 98.4 ± 85.8              | 0.282   |
| Total protein, mg/dL                  | 5.03 ± 1.1               | 5.01 ± 1.0               | 0.863   |
| Albumin, mg/dL                        | 2.7 ± 0.6                | 2.7 ± 0.5                | 0.678   |
| Aspartate aminotransferase, IU/L      | 710.1 ± 1,309.4          | 693.8 ± 1,335.4          | 0.897   |
| Alanine aminotransferase, IU/L        | 376.0 ± 903.4            | 399.9 ± 897.5            | 0.780   |
| Total bilirubin, mg/dL                | 4.63 ± 7.44              | 4.59 ± 7.38              | 0.955   |
| C-reactive protein, mg/dL             | 13.16 ± 10.17            | 12.08 ± 10.80            | 0.321   |
| Indication for CRRT initiation        |                          |                          |         |
| Sepsis                                | 93 (55.0)                | 172 (51.3)               | 0.434   |
| Postoperation                         | 14 (8.3)                 | 40 (11.9)                | 0.210   |
| Cardiac                               | 17 (10.1)                | 47 (14.0)                | 0.206   |
| Pulmonary                             | 0                        | 2 (0.6)                  | 0.553   |
| Hepatic                               | 9 (5.3)                  | 11 (3.3)                 | 0.268   |
| Renal                                 | 20 (11.8)                | 28 (8.4)                 | 0.209   |
| Malignancy                            | 11 (6.5)                 | 14 (4.2)                 | 0.255   |
| Others                                | 2 (1.2)                  | 12 (3.6)                 | 0.156   |

Values are presented as number (%) or mean ± standard deviation.

WBC, white blood cell; CRRT, continuous renal replacement therapy.
